# Supplementary material for: Zygotene cilia regulate meiosis, germ cell development and fertility in zebrafish, mice, and humans
Source: Research Square preprint supplement (doi:10.21203/rs.3.rs-7733942/v1), 2025-10-21
Supplement: Supplementary file 1 [file 440ab5dcc3634941b912ec51.docx]

**Table S4: Clinical data of identified men from the MERGE cohort with homozygous variants**

| **Case ID** | **Gene** | **Variant** | **Phenotype** | **Testicular volume (right/left) [ml]** | | **FSH**  **[IU/L]** | **LH**  **[IU/L]** | **Testosterone**  **[nm/L]** |
| --- | --- | --- | --- | --- | --- | --- | --- | --- |
| M1438 | ADPGK | c.316C>T p.(His106Tyr) | Crypto | **6** | **4** | 6.5 | 2.5 | 34.4 |
| M1679 | EPB41L3 | c.2098G>A p.(Asp700Asn) | Azoo | 15 | **11** | **28** | **11.2** | 33.6 |
| M3242 | IFT46 | c.839C>T p.(Thr280Met) | Crypto | **6** | **7** | **11.7** | 4.6 | 24.7 |
| M3087 | PPP2R1B | c.101A>T p.(Asn34Ile) | Azoo | 14 | 15 | 3.5 | 2.5 | 15.3 |
| M3941 | PPP2R1B | c.101A>T p.(Asn34Ile) | Azoo | 20 | 22 | **7.1** | **11.6** | 23.4 |
| M3462 | PSRC1 | c.319C>T p.(Arg107Ter) | Azoo | NA | NA | 3.7 | 3.3 | **7.97** |
| M1059 | THOP1 | c.1795G>A p.(Gly599Ser) | Azoo | 14 | **9** | **13.6** | 8 | 11.9 |

**Reference values**: testicular volume ≥12 mL per testis, FSH (follicle stimulating hormone): 1-7 IU/L, LH (luteinizing hormone): 2-10 IU/L, Testosterone: ≥12 nmol/L, NA: not available

Values outside the normal range are highlighted in bold.
