# Supplementary material for: Zygotene cilia regulate meiosis, germ cell development and fertility in zebrafish, mice, and humans
Source: Research Square preprint supplement (doi:10.21203/rs.3.rs-7733942/v1), 2025-10-21
Supplement: Supplementary file 2 [file 5b711cffbbaa905d2829470f.xlsx]

## Sheet: Loss of function variants
Constrained gene	chrom	pos hg19	pos hg38	ref	alt	gene	worst_consequence	callset_freq	exac_freq	gnomad_genomes_freq	gnomad_exomes_freq	topmed_freq	cadd	revel	eigen	splice_ai	polyphen	sift	muttaster	fathmm	rsid	hgvsc	hgvsp	clinvar_clinical_significance	clinvar_gold_stars	tags_1
Yes	1		39357674	C	CA	MACF1	frameshift_variant	0.5	0	0	0	0										ENST00000361689.6:c.5539dupA	ENSP00000354573.2:p.Ser1847LysfsTer44
	1	223949924	223085206	AG	A	CAPN2	frameshift_variant		0	0	0	0										ENST00000295006.5:c.1605del	ENSP00000295006.5:p.Arg536AspfsTer22
Yes	2		121445446	TA	T	CLASP1	splice_donor_variant	0.5	0	0	0	0										ENST00000541377.5:c.1960+2del
	2		231276776	G	A	ARMC9	splice_donor_variant	0.5	0	0	0	0	24.1		15.377	0.9813			damaging			ENST00000611582.4:c.1474+1G>A
	3		101762561	G	A	CEP97	splice_donor_variant	0.5	0	0	0	0	27.4		20.649	0.9927			damaging			ENST00000341893.7:c.1893+1G>A
	3	132407695	132688851	G	GTT	NPHP3	frameshift_variant		0	0	0	0										ENST00000337331.5:c.2922_2923dup	ENSP00000338766.5:p.Thr975LysfsTer4
	3		132719133	CTCCCTAAAAATCTTTAAAAAGAATAATTT	C	NPHP3	splice_acceptor_variant	0.5	0	0	0	0										ENST00000337331.10:c.520-18_530del
Yes	4		109494614	G	T	SEC24B	splice_acceptor_variant	0.5	0	0	0	0	24		16.492	0.9986			damaging			ENST00000504968.6:c.1340-1G>T
	5		37195984	C	A	C5orf42	stop_gained	0.5	0	0	0	0	37		15.781	0.0378						ENST00000425232.6:c.3685G>T	ENSP00000389014.2:p.Gly1229Ter
	5	150496686	151117125	A	C	ANXA6	splice_donor_variant		0	0	0	0	34		15.694	0.99			damaging			ENST00000354546.5:c.1572+2T>G				Maternal
	5	150508967	151129406	C	T	ANXA6	splice_donor_variant		0	0	0	0	34		17.581	1			damaging		rs113130301	ENST00000354546.5:c.918+1G>A
	6		31810700	T	A	HSPA1L	stop_gained	0.5	0	0	0	0	41		7.997	0.0036			damaging			ENST00000375654.4:c.1273A>T	ENSP00000364805.4:p.Lys425Ter
	6	52884048	53019250	A	C	ICK	stop_gained		0	0	0	0	35		4.112	0.12						ENST00000356971.3:c.468T>G	ENSP00000349458.3:p.Tyr156Ter
	9	27017038	27017040	T	G	IFT74	stop_gained		0	0	0	0	41		10.907	0						ENST00000443698.1:c.923T>G	ENSP00000404122.1:p.Leu308Ter
	9	27017049	27017051	G	T	IFT74	splice_donor_variant		0	0	0	0	34		24.032	1			damaging			ENST00000443698.1:c.933+1G>T
	9	27044795	27044797	T	C	IFT74	splice_donor_variant		0	0	0	0	29.9		14.156	0.99			damaging			ENST00000443698.1:c.1108+2T>C
	9		27055614	C	T	IFT74	stop_gained	0.5	0	0	0	0	39		7.308	0.002						ENST00000443698.5:c.1339C>T	ENSP00000404122.1:p.Gln447Ter
	9		136856905	A	G	MAMDC4	splice_acceptor_variant	0.5	0	0	0	0	23.2		7.545	0.858			damaging			ENST00000317446.6:c.1838-2A>G
	11	18497149	18475602	T	A	LDHAL6A	stop_gained		0	0	0	0	37		5.861	0.02						ENST00000280706.2:c.555T>A	ENSP00000280706.2:p.Cys185Ter
	11	46819379	46797829	C	CT	CKAP5	frameshift_variant		0	0	0	0										ENST00000529230.1:c.1313dup	ENSP00000432768.1:p.Pro439AlafsTer8			Maternal
	11		103176342	GGAATT	G	DYNC2H1	frameshift_variant	0.5	0	0	0	0										ENST00000375735.7:c.5791_5795del	ENSP00000364887.2:p.Leu1931ArgfsTer5
	12	3042662	2933496	TC	T	TULP3	frameshift_variant		0	0	0	0										ENST00000397132.2:c.776del	ENSP00000380321.2:p.Ser259PhefsTer30
	12	6341856	6232690	C	CTGCG	CD9	frameshift_variant		0	0	0	0										ENST00000382518.1:c.235_238dup	ENSP00000371958.1:p.Gly80ValfsTer25			Maternal
	13	73491260	72917122	T	G	PIBF1	stop_gained		0	0	0	0	41		7.263	0.29						ENST00000326291.6:c.1686T>G	ENSP00000317144.6:p.Tyr562Ter
	15	99740219	99200014	CA	C	TTC23	frameshift_variant		0	0	0	0										ENST00000394132.2:c.663del	ENSP00000377690.2:p.Glu222LysfsTer10
	17		6611993	CT	C	KIAA0753	frameshift_variant	0.5	0	0	0	0				0						ENST00000361413.8:c.1470del	ENSP00000355250.3:p.Ala491GlnfsTer7
	17	8079133	8175815	C	CA	TMEM107	frameshift_variant		0	0	0	0										ENST00000316425.5:c.215dup	ENSP00000314116.5:p.Glu73GlyfsTer26
	17	61830144	63752784	TA	T	CCDC47	frameshift_variant		0	0	0	0										ENST00000225726.5:c.1049del	ENSP00000225726.5:p.Leu350Ter
Yes	18		21768669	G	T	MIB1	stop_gained	0.5	0	0	0	0	37		24.681	0.5074						ENST00000261537.6:c.448G>T	ENSP00000261537.6:p.Gly150Ter	Uncertain_significance	1
	20		1375474	CA	C	FKBP1A	frameshift_variant	0.5	0	0	0	0										ENST00000614856.1:c.214delT	ENSP00000482758.1:p.Cys72ValfsTer15
