# Supplementary material for: Zygotene cilia regulate meiosis, germ cell development and fertility in zebrafish, mice, and humans
Source: Research Square preprint supplement (doi:10.21203/rs.3.rs-7733942/v1), 2025-10-21
Supplement: Supplementary file 3 [file 5be648709711ffb93945f968.xlsx]

## Sheet: ClinVar pathogenic variants
chrom	pos hg19	pos hg38	ref	alt	gene	worst_consequence	callset_freq	exac_freq	gnomad_genomes_freq	gnomad_exomes_freq	topmed_freq	cadd	revel	eigen	splice_ai	polyphen	sift	muttaster	fathmm	rsid	hgvsc	hgvsp	clinvar_clinical_significance	clinvar_gold_stars	tags_1
1	214813425	214640082	G	T	CENPF	stop_gained		2.471e-05	0	4.68324e-05	1.59276e-05	38		13.666	0						ENST00000366955.3:c.1744G>T	ENSP00000355922.3:p.Glu582Ter	Pathogenic	1
2	44021647	43794508	G	A	DYNC2LI1	stop_gained		4.118e-05	0	5.97372e-05	7.96381e-06	43	0.328	12.305	0						ENST00000260605.8:c.372G>A	ENSP00000260605.8:p.Trp124Ter	Pathogenic	1
3		132692787	C	T	NPHP3	missense_variant	0.5	8.236e-06	0	3.97839e-06	3.98191e-05	26.1	0.906	8.891	0.1131	damaging	damaging	damaging	damaging		ENST00000337331.9:c.2342G>A	ENSP00000338766.5:p.Gly781Asp	Likely_pathogenic	1
4		5753793	C	T	EVC	stop_gained	0.5	8.236e-06	6.57177e-06	7.95349e-06	0	53		10.91	0.22				damaging		ENST00000264956.11:c.1324C>T	ENSP00000264956.6:p.Gln442Ter	Pathogenic	1
4		99608827	G	A	MTTP	missense_variant	0.5	2.471e-05	3.28636e-05	1.59265e-05	1.1334e-05	28.7	0.899	8.735	0	damaging	damaging		damaging	rs199422220	ENST00000265517.10:c.1619G>A	ENSP00000265517.5:p.Arg540His	Pathogenic	2
4	170345819	169424668	G	C	NEK1	stop_gained		0.0001159	6.37146e-05	0.000124485	0.00010353	36		5.83	0					rs199947197	ENST00000507142.1:c.3107C>G	ENSP00000424757.1:p.Ser1036Ter	Pathogenic/Likely_pathogenic	2	Paternal
6		51747898	G	A	PKHD1	stop_gained	0.5	0	0	7.96083e-06	1.59276e-05	38		5.137	0.002						ENST00000371117.7:c.9718C>T	ENSP00000360158.3:p.Arg3240Ter	Pathogenic/Likely_pathogenic	2
6	51924836	52060038	G	A	PKHD1	missense_variant		2.471e-05	0	2.38956e-05	1.59276e-05	32	0.659	8.148	0.14	damaging	damaging		damaging	rs376040501	ENST00000371117.3:c.1123C>T	ENSP00000360158.3:p.Arg375Trp	Pathogenic/Likely_pathogenic	2
6	51935807	52071009	T	C	PKHD1	missense_variant		9.884e-05	6.37796e-05	0.00010363	8.76019e-05	15.03	0.526	1.906	0.14		damaging		damaging	rs369925690	ENST00000371117.3:c.664A>G	ENSP00000360158.3:p.Ile222Val	Pathogenic/Likely_pathogenic	2
6		52083201	G	A	PKHD1	missense_variant	0.5	0.0005189	0.0010195	0.000445651	0.000422082	24.2	0.749	7.729	0.0506	damaging	damaging		damaging	rs137852944	ENST00000371117.7:c.107C>T	ENSP00000360158.3:p.Thr36Met	Pathogenic	2
7	2625906	2586272	TTGTCCCGGAG	T	IQCE	frameshift_variant		0.001042	0.00092392	0.000955348	0.0013857	29.8									ENST00000402050.2:c.895_904del	ENSP00000385597.2:p.Val301SerfsTer8	Pathogenic	2
7	2634517	2594883	TAGAG	T	IQCE	splice_acceptor_variant		0.000273	0.000191119	0.00026045	0.000318552	25.1			0.99						ENST00000402050.2:c.1350_1353del	ENSP00000385597.2:p.Glu451ArgfsTer15	Pathogenic	1	Maternal
10	95262942	93503185	C	T	CEP55	stop_gained		0.0003789	0.000286679	0.000282468	0.000222987	36		4.649	0					rs141458677	ENST00000371485.3:c.256C>T	ENSP00000360540.3:p.Arg86Ter	Pathogenic	0
10	122630690	120871178	G	A	WDR11	missense_variant		0.0001318	3.18573e-05	0.000167037	0.000294661	19.1	0.417	1.338	0		tolerated		damaging	rs318240760	ENST00000263461.6:c.1303G>A	ENSP00000263461.5:p.Ala435Thr	Pathogenic	0
11	66293652	66526181	T	G	BBS1	missense_variant		0.001483	0.00203809	0.00151161	0.00209448	26.1	0.662	4.939	0.01		damaging		tolerated	rs113624356	ENST00000318312.7:c.1169T>G	ENSP00000317469.7:p.Met390Arg	Pathogenic/Likely_pathogenic	2
11		66526181	T	G	CTD-3074O7.11	missense_variant	0.25	0.001483	0.00203809	0.00151161	0.00209448	28.4	0.662	4.939	0.0068		damaging		tolerated	rs113624356	ENST00000419755.3:c.1280T>G	ENSP00000398526.3:p.Met427Arg	Pathogenic	2
11	71152459	71441413	C	T	DHCR7	missense_variant		6.589e-05	0	8.83775e-05	0.000127421	24	0.937	6.342	0	damaging	damaging	damaging	damaging		ENST00000355527.3:c.440G>A	ENSP00000347717.3:p.Gly147Asp	Pathogenic/Likely_pathogenic	2
11		71435840	C	G	DHCR7	splice_acceptor_variant	0.333	0.003434	0.00382385	0.00385779	0.00465883	23.8		17.083	0.9924			damaging		rs138659167	ENST00000355527.7:c.964-1G>C		Pathogenic/Likely_pathogenic	2
11		71444036	G	A	DHCR7	missense_variant	0.25	2.471e-05	0.000127543	4.00006e-05	6.37105e-05	24.2	0.785	3.779	0.0005	damaging	damaging		damaging	rs80338853	ENST00000355527.7:c.278C>T	ENSP00000347717.3:p.Thr93Met	Pathogenic/Likely_pathogenic	2
11	103175379	103304650	C	T	DYNC2H1	missense_variant		1.655e-05	0	2.41241e-05	2.38914e-05	27.4	0.193	3.598	0		damaging	damaging	tolerated		ENST00000398093.3:c.11333C>T	ENSP00000381167.3:p.Ala3778Val	Likely_pathogenic	2
11		111764842	C	T	PPP2R1B	missense_variant	0.5	0.006268	0.00681789	0.00651629	0.00735856	22.2	0.079	0.767	0		tolerated		tolerated	rs1805076	ENST00000527614.6:c.269G>A	ENSP00000437193.1:p.Gly90Asp	Pathogenic	0
11	117266341	117395625	C	T	CEP164	stop_gained		0	0	3.98064e-06	7.96381e-06	37		3.74	0						ENST00000278935.3:c.2992C>T	ENSP00000278935.3:p.Arg998Ter	Pathogenic	1
12		88049340	C	CTT	CEP290	frameshift_variant	0.5	1.658e-05	1.97444e-05	8.49041e-06	1.889e-05	34									ENST00000552810.6:c.7283_7284insAA	ENSP00000448012.1:p.Tyr2429SerfsTer8	Pathogenic	1
12		88083854	G	A	CEP290	missense_variant	0.333	0.0002406	6.37389e-05	0.00022598	0.00010353	29.9	0.611	7.423	0.0051		damaging	damaging	damaging	rs369451049	ENST00000552810.5:c.4805C>T	ENSP00000448012.1:p.Thr1602Met	Likely_pathogenic	1
12	88510853	88117076	A	T	CEP290	stop_gained		1.703e-05	0	1.66694e-05	1.59276e-05	35		3.744	0.63					rs371496675	ENST00000552810.1:c.1781T>A	ENSP00000448012.1:p.Leu594Ter	Pathogenic	2
12		94375912	G	A	CEP83	stop_gained	0.25	3.315e-05	6.37959e-05	1.88565e-05	4.77829e-05	36		2.802	0.0226						ENST00000397809.9:c.907C>T	ENSP00000380911.4:p.Arg303Ter	Pathogenic	1
13		72835359	G	A	PIBF1	missense_variant	0.5	0.014	0.00568985	0.0147779	0.0105998	34	0.414	8.717	0	damaging	damaging	damaging	tolerated	rs17089782	ENST00000326291.10:c.1214G>A	ENSP00000317144.6:p.Arg405Gln	Likely_pathogenic	1
14		58432438	AG	A	KIAA0586	frameshift_variant	0.5	0.003281	0.00359873	0.00305043	0.00360761	28.5			0						ENST00000652326.2:c.392del	ENSP00000498929.1:p.Arg131LysfsTer4	Pathogenic/Likely_pathogenic	2
14	58899156	58432438	AG	A	KIAA0586	frameshift_variant		0.003281	0.00359873	0.00305043	0.00360761	29			0						ENST00000354386.6:c.428del	ENSP00000346359.6:p.Arg143LysfsTer4	Pathogenic/Likely_pathogenic	2
16		1580832	G	A	IFT140	missense_variant	0.5	4.118e-05	0	3.18365e-05	0	26.4	0.341	4.971	0		damaging	damaging	tolerated		ENST00000426508.7:c.1451C>T	ENSP00000406012.2:p.Thr484Met	Pathogenic/Likely_pathogenic	2
16		49635902	C	T	ZNF423	missense_variant	0.5	9.082e-05	0	6.38261e-05	7.96381e-06	20.6	0.146	1.838	0		tolerated	damaging	tolerated		ENST00000561648.5:c.3250G>A	ENSP00000455426.1:p.Val1084Ile	Likely_pathogenic	0
17	61829694	63752334	G	A	CCDC47	stop_gained		0	9.5584e-05	0	0	38		6.445	0.46						ENST00000225726.5:c.1189C>T	ENSP00000225726.5:p.Arg397Ter	Pathogenic/Likely_pathogenic	2
