# Supplementary material for: Zygotene cilia regulate meiosis, germ cell development and fertility in zebrafish, mice, and humans
Source: Research Square preprint supplement (doi:10.21203/rs.3.rs-7733942/v1), 2025-10-21
Supplement: Supplementary file 4 [file c5bab1d21b4be1297c12da54.xlsx]

## Sheet: Potential biallelic variants
	chrom	pos	ref	alt	chrom	pos hg19	pos hg38	ref	alt	gene	worst_consequence	callset_freq	exac_freq	gnomad_genomes_freq	gnomad_exomes_freq	topmed_freq	cadd	revel	eigen	splice_ai	polyphen	sift	muttaster	fathmm	rsid	hgvsc	hgvsp	clinvar_clinical_significance	clinvar_gold_stars	tags_1
	1	19112582	G	A	1		19112582			UBR4	missense_variant	0.5	1.647e-05	0	2.39236e-05	0	33	0.493	9.64	0	damaging	damaging	damaging	tolerated	rs200579841	ENST00000375254.8:c.11743C>T	ENSP00000364403.3:p.Arg3915Cys																					AUD230206018	1
	1	19121394	A	C	1		19121394			UBR4	missense_variant	0.5	0	0	0	0	13.02	0.339	0.349	0	damaging	tolerated	damaging	tolerated		ENST00000375254.8:c.9936T>G	ENSP00000364403.3:p.Asp3312Glu																					AUD230206018	1
	1	39269332	A	G	1		39269332			MACF1	missense_variant	0.5	0	0	0	0	4.372	0.136	0.676			damaging		damaging		ENST00000530262.5:c.635A>G	ENSP00000437059.1:p.Asn212Ser																					AS19D026	1
	1	39331240	C	T	1		39332041			MACF1	missense_variant	0.5	8.237e-06	0	0	0	17.97	0.404	5.57	0.12		damaging	damaging	tolerated		ENST00000564288.6:c.4652C>T	ENSP00000455274.1:p.Thr1551Ile																					AUD230206019	1
	1	39332041	C	T	1		39331240			MACF1	missense_variant	0.5	2.471e-05	0	1.59344e-05	7.96381e-06	16.06	0.501	7.041	0	damaging	damaging	damaging	tolerated	rs202109384	ENST00000289893.8:c.773C>T	ENSP00000289893.4:p.Thr258Met																					AS19D026	1
	1	39333324	G	T	1		39333324			MACF1	missense_variant	0.5	0	0	0	0	8.976	0.024	0.541	0		tolerated		tolerated		ENST00000564288.6:c.6736G>T	ENSP00000455274.1:p.Ala2246Ser																					AUD230206019	1
	4	15515993	A	G	4		15515993			CC2D2A	missense_variant	0.5	0	0	4.60375e-06	7.55601e-06	1.18	0.063	0.1	0.07		tolerated				ENST00000424120.6:c.1006A>G	ENSP00000403465.1:p.Met336Val																					AS24D018-pt	1
	4	15528621	T	A	4		15528621			CC2D2A	missense_variant	0.5	0	0	0	0	31	0.527	6.951	0.14	damaging	damaging	damaging	damaging		ENST00000424120.6:c.1361T>A	ENSP00000403465.1:p.Leu454His
	4	39241898	G	A	4	39241898	39240278	G	A	WDR19	missense_variant		0.0001735	0.000738137	8.31532e-05	0.000860092	34	0.715	14.727	0.01	damaging	damaging	damaging	tolerated	rs199904529	ENST00000399820.3:c.2365G>A	ENSP00000382717.3:p.Gly789Ser	Conflicting_interpretations_of_pathogenicity	1
	4	39247014	C	T	4	39247014	39245394	C	T	WDR19	missense_variant		0.0002566	0.000605365	0.00018099	0.00066896	22	0.223	2.184	0.02		tolerated	damaging	tolerated	rs200266424	ENST00000399820.3:c.2671C>T	ENSP00000382717.3:p.His891Tyr	Conflicting_interpretations_of_pathogenicity	1
	4	87662932	G	A	4	87662932	86741779	G	A	PTPN13	missense_variant		8.278e-05	0.000159276	9.04866e-05	0.000159276	31	0.593	8.675	0.07		damaging	damaging	damaging	rs373380309	ENST00000436978.1:c.2450G>A	ENSP00000394794.1:p.Arg817His
	4	87728874	A	G	4	87728874	86807721	A	G	PTPN13	missense_variant		4.964e-05	9.55292e-05	5.61626e-05	9.55657e-05	20.9	0.309	1.617	0		tolerated	damaging	damaging	rs371474408	ENST00000436978.1:c.6922A>G	ENSP00000394794.1:p.Thr2308Ala
	4	168711914	A	G	4		168711914			PALLD	missense_variant	0.5	3.295e-05	0	2.80339e-05	5.57467e-05	23	0.192	3.454	0.0058		damaging	damaging	tolerated	rs370665218	ENST00000505667.5:c.1955A>G	ENSP00000425556.1:p.Lys652Arg																					AS18D070	1
	4	168894675	C	G	4		168894675			PALLD	missense_variant	0.5	6.589e-05	0.000127372	5.19908e-05	0.000215023	24.7	0.224	4.317	0.2268	damaging	damaging	damaging	tolerated	rs140360991	ENST00000505667.5:c.2197C>G	ENSP00000425556.1:p.Gln733Glu	Uncertain_significance	1																			AS18D070	1
hom	4	183680209	A	G	4		183680209			TRAPPC11	missense_variant	1	8.236e-06	0	1.19305e-05	1.889e-05	26.9	0.614	7.852	0	damaging	tolerated	damaging	damaging		ENST00000334690.11:c.1055A>G	ENSP00000335371.6:p.Gln352Arg	Uncertain_significance	2
	5	37180173	C	G	5	37180173	37180071	C	G	C5orf42	missense_variant		8.246e-06	0	8.56098e-06	1.59276e-05	10.55	0.075	0.792	0.01		tolerated		tolerated		ENST00000425232.2:c.5683G>C	ENSP00000389014.2:p.Glu1895Gln	Uncertain_significance	1
	5	37206510	T	G	5	37206510	37206408	T	G	C5orf42	missense_variant		0	0	6.37097e-06	1.59276e-05	21.2	0.047	1.7	0		damaging	damaging	tolerated		ENST00000425232.2:c.2938A>C	ENSP00000389014.2:p.Ile980Leu
het cp	5	65321356	T	A	5	65321356	66025528	T	A	ERBIN	missense_variant		0	0	0	0	21.1	0.191	1.105	0		tolerated	damaging	tolerated		ENST00000506030.1:c.866T>A	ENSP00000426632.1:p.Met289Lys			Het cmpd
	5	65349674	G	A	5	65349674	66053846	G	A	ERBIN	missense_variant		1.647e-05	3.18492e-05	1.99375e-05	7.96381e-06	13.34	0.145	0.585	0		damaging		tolerated		ENST00000506030.1:c.2528G>A	ENSP00000426632.1:p.Cys843Tyr	Uncertain_significance	1
	5	150503859	T	A	5	150503859	151124298	T	A	ANXA6	missense_variant		0	0	0	0	28	0.379	7.178	0.01	damaging	damaging	damaging	tolerated		ENST00000354546.5:c.1126A>T	ENSP00000346550.5:p.Met376Leu
	5	150508967	C	T	5	150508967	151129406	C	T	ANXA6	splice_donor_variant		0	0	0	0	34		17.581	1			damaging		rs113130301	ENST00000354546.5:c.918+1G>A
	7	107564410	T	C	7	107564410	107923965	T	C	LAMB1	missense_variant		9.06e-05	6.36902e-05	6.88956e-05	3.18552e-05	24.9	0.498	4.682	0		damaging	damaging	damaging	rs374245297	ENST00000222399.6:c.5347A>G	ENSP00000222399.6:p.Ser1783Gly	Uncertain_significance	1
	7	107596023	G	A	7	107596023	107955578	G	A	LAMB1	missense_variant		0.0001318	0.000159266	0.000127486	0.000135385	34	0.564	11.759	0.15	damaging	damaging	damaging	tolerated		ENST00000222399.6:c.2743C>T	ENSP00000222399.6:p.Arg915Cys
	8	143586251	C	T	8		143586251			EEF1D	missense_variant	0.5	0	0	0	0	27.4	0.538	3.318	0.002		damaging	damaging			ENST00000423316.6:c.1255G>A	ENSP00000410059.2:p.Ala419Thr																					AS18D055	1
	8	143586257	C	A	8		143586257			EEF1D	missense_variant	0.5	0	0	0	0	26.1	0.262	2.882	0.0032		damaging	damaging			ENST00000423316.6:c.1249G>T	ENSP00000410059.2:p.Ala417Ser																					AS18D055	1
	8	143589762	G	A	8		143589762			EEF1D	missense_variant	0.5	4.135e-05	0	2.58342e-05	7.16743e-05	20.2	0.101	1.919	0		tolerated	damaging		rs375424802	ENST00000423316.6:c.320C>T	ENSP00000410059.2:p.Ser107Leu																					AS18D055	1
	9	103046625	G	A	9	103046625	100284343	G	A	INVS	missense_variant		3.305e-05	0	3.65895e-05	0	31	0.142	6.249	0.06	damaging	tolerated	damaging	tolerated	rs372596288	ENST00000262457.2:c.1808G>A	ENSP00000262457.2:p.Arg603Gln	Uncertain_significance	1
	9	103046788	C	G	9	103046788	100284506	C	G	INVS	missense_variant		0.0001236	0.000382141	9.18362e-05	0.000453937	3.193	0.014	0.322	0		tolerated		tolerated	rs114942117	ENST00000262457.2:c.1971C>G	ENSP00000262457.2:p.Asp657Glu	Uncertain_significance	2
	9	103055225	G	A	9	103055225	100292943	G	A	INVS	missense_variant		0.0001318	0.000382263	0.000119357	0.000477829	19.92	0.040	1.851	0		tolerated	damaging	tolerated	rs114847355	ENST00000262457.2:c.2686G>A	ENSP00000262457.2:p.Val896Ile	Uncertain_significance	2
	9	103055324	A	G	9	103055324	100293042	A	G	INVS	missense_variant		0.0001236	0.000382166	9.24415e-05	0.00043801	24.3	0.032	2.066	0.31		damaging	damaging	tolerated	rs116188920	ENST00000262457.2:c.2785A>G	ENSP00000262457.2:p.Ser929Gly	Uncertain_significance	2
	10	94223618	C	T	10	94223618	92463861	C	T	IDE	missense_variant		0	0	3.97845e-06	3.98191e-05	28.9	0.344	11.193	0		damaging	damaging	tolerated	rs374667709	ENST00000265986.6:c.2631G>A	ENSP00000265986.6:p.Met877Ile
	10	94333763	AG	A	10	94333763	92574006	AG	A	IDE	frameshift_variant		0.0003361	0.000573358	0.000958038	0.00107511	28.2			0.01						ENST00000265986.6:c.13del	ENSP00000265986.6:p.Leu5Ter
not phased	11	103120738	C	T	11		103120738			DYNC2H1	missense_variant	0.5	0.000274	0.000291867	0.000266603	0.000199095	15.82	0.034	1.282	0.0044		tolerated	damaging	tolerated	rs200822573	ENST00000398093.7:c.1184C>T	ENSP00000381167.3:p.Ala395Val
	11	103321208	G	A	11		103321208			DYNC2H1	missense_variant	0.5	0.0002981	0.000574016	0.00026015	0.000987513	0.315	0.045	0.039	0.0367		tolerated	damaging	tolerated	rs189100009	ENST00000398093.7:c.11926G>A	ENSP00000381167.3:p.Val3976Ile	Conflicting_interpretations_of_pathogenicity	1
	12	123694892	C	T	12		123694892			TCTN2	missense_variant	0.5	0.0001977	7.2338e-05	0.000231081	0.000124674	23	0.489	5.347	0.05		damaging		damaging	rs372235872	ENST00000303372.7:c.1150C>T	ENSP00000304941.5:p.His384Tyr	Conflicting_interpretations_of_pathogenicity	1
	12	123704624	C	G	12		123704624			TCTN2	missense_variant	0.5	2.471e-05	1.32093e-05	3.18142e-05	3.778e-06	21.8	0.355	4.721	0		damaging		damaging	rs371239697	ENST00000303372.7:c.1705C>G	ENSP00000304941.5:p.Leu569Val	Uncertain_significance	1
	16	1526653	C	T	16		1526653			IFT140	missense_variant	0.5	5.114e-05	3.19244e-05	4.14066e-05	7.96381e-05	21.8	0.267	2.275	0		damaging		tolerated		ENST00000426508.6:c.2543G>A	ENSP00000406012.2:p.Arg848His																					AS21D005	1
	16	1583330	G	A	16		1583330			IFT140	synonymous_variant	0.5	0	0	0	0	6.193		9.133	0.0004						ENST00000426508.6:c.1416C>T	ENST00000426508.6:c.1416C>T(p.=)																					AS21D005	1
	17	6503770	G	A	17	6503770	6600450	G	A	KIAA0753	missense_variant		0	0	0	0	24.6	0.244	4.606	0.3		tolerated		damaging		ENST00000361413.3:c.2018C>T	ENSP00000355250.3:p.Ala673Val
	17	6531827	G	A	17	6531827	6628507	G	A	KIAA0753	stop_gained		8.275e-06	0	4.01011e-06	7.96381e-06	36		9.208	0					rs374102451	ENST00000361413.3:c.328C>T	ENSP00000355250.3:p.Arg110Ter
	17	18150546	G	C	17	18150546	18247232	G	C	FLII	missense_variant		3.295e-05	0.000128271	2.45537e-05	5.57467e-05	18.27	0.185	1.278	0.01		tolerated	damaging	tolerated	rs374278447	ENST00000327031.4:c.2613C>G	ENSP00000324573.4:p.Asp871Glu
	17	18156967	C	T	17	18156967	18253653	C	T	FLII	missense_variant		3.295e-05	0.000127494	2.39412e-05	5.57467e-05	22.2	0.098	1.524	0.01		damaging	damaging	tolerated	rs369155836	ENST00000327031.4:c.746G>A	ENSP00000324573.4:p.Arg249His
hom	17	26656239	G	T	17	26656239	28329213	G	T	IFT20	missense_variant		0.0001235	3.18431e-05	0.000131252	8.76019e-05	23.5	0.212	8.057	0.06		tolerated	damaging		rs143925342	ENST00000585089.1:c.355C>A	ENSP00000464443.1:p.Leu119Ile
not phased	17	28330226	ACT	A	17		28330226			IFT20	frameshift_variant	0.5	0	0.000203799	0.000154131	0.000246878	1.801									ENST00000357896.7:c.214_215delAG	ENSP00000350570.3:p.Leu73CysfsTer49
	17	28330465	T	G	17		28330465			IFT20	missense_variant	0.5	0.0004201	0.000636902	0.000473259	0.00101937	22.7	0.079	1.772	0.0032			damaging		rs148686581	ENST00000585089.5:c.269A>C	ENSP00000464443.1:p.Glu90Ala
	17	37179305	A	T	17		37179305			ACACA	missense_variant	0.5	0	0	0	0	15.69	0.273	0.821	0			damaging	damaging		ENST00000616317.5:c.5034T>A	ENSP00000483300.1:p.Asp1678Glu																					AS24D014-pt	1
	17	37257713	C	T	17		37257713			ACACA	missense_variant	0.5	0	0	0	0	27.5	0.692	6.211	0			damaging	damaging		ENST00000616317.5:c.1816G>A	ENSP00000483300.1:p.Glu606Lys																					AS24D009-pt	1
not phased	17	73916166	C	T	17	73916166	75920085	C	T	FBF1	missense_variant		0.0001911	6.37959e-05	0.000212882	0.000135385	24.2	0.067	4.07			damaging	damaging	tolerated		ENST00000319129.5:c.1808G>A	ENSP00000324292.5:p.Arg603Gln
	17	73922167	G	C	17	73922167	75926086	G	C	FBF1	missense_variant		0.0001988	6.37267e-05	0.000196197	0.000127421	23.3	0.251	4.506			damaging	damaging	tolerated	rs201197761	ENST00000319129.5:c.770C>G	ENSP00000324292.5:p.Pro257Arg
hom	17	75921991	C	T	17		75921991			FBF1	missense_variant	0.6	0.001117	0.00108377	0.00225656	0.00143349	10.82	0.031	0.925					tolerated	rs61744136	ENST00000627351.1:c.1435G>A	ENSP00000486708.1:p.Gly479Arg
hom	18	8825739	C	T	18		8825739			MTCL1	missense_variant	1	0	0	0	3.778e-06	23.5	0.172	5.129	0			damaging	damaging		ENST00000695636.1:c.5309C>T	ENSP00000512073.1:p.Thr1770Met																					AS24D025-pt	2
	19	6187333	T	C	19	6187333	6187322	T	C	ACSBG2	missense_variant		4.118e-05	6.37471e-05	1.98823e-05	4.77829e-05	14.87	0.073	0.684	0		damaging		tolerated	rs137960724	ENST00000586696.1:c.1580T>C	ENSP00000465589.1:p.Ile527Thr
	19	6190601	T	C	19	6190601	6190590	T	C	ACSBG2	missense_variant		4.942e-05	6.37105e-05	2.38629e-05	4.77829e-05	5.711	0.159	0.016	0		tolerated		tolerated	rs112210631	ENST00000586696.1:c.1934T>C	ENSP00000465589.1:p.Met645Thr
	19	51848473	G	A	19	51848473	51345219	G	A	ETFB	missense_variant		5.765e-05	0	5.56731e-05	1.59276e-05	26.2	0.565	2.826	0		damaging	damaging	damaging	rs370522844	ENST00000354232.4:c.1033C>T	ENSP00000346173.3:p.Arg345Trp	Uncertain_significance	1
	19	51856415	TCTC	T	19	51856415	51353161	TCTC	T	ETFB	inframe_deletion		2.471e-05	0	2.38897e-05	1.59276e-05	22.1			0.02						ENST00000354232.4:c.616_618del	ENSP00000346173.3:p.Glu206del
[truncated: 34 more columns]
